# Supplementary material for: Au nanoparticle-coated, PLGA-based hybrid capsules for combined ultrasound imaging and HIFU therapy
Source: Royal Society of Chemistry journal article supplement (doi:10.1039/c5tb00200a), 2015-01-01
Supplement: c5tb00200a1.pdf [file c5tb00200a1.pdf]

# Au-nanoparticles Coated PLGA-based Hybrid Capsules for Combined Ultrasound Mediated Imaging and HIFU Therapy

## Support Information

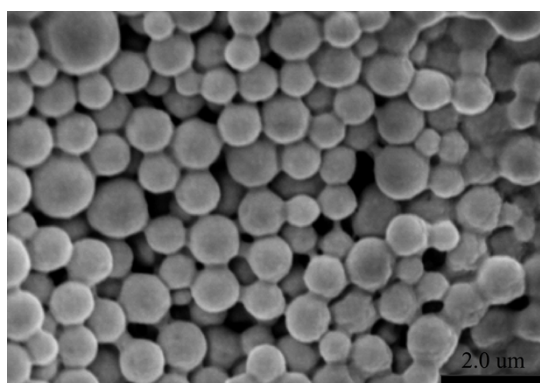

Figure S1 SEM image of PLGA nanocapsules

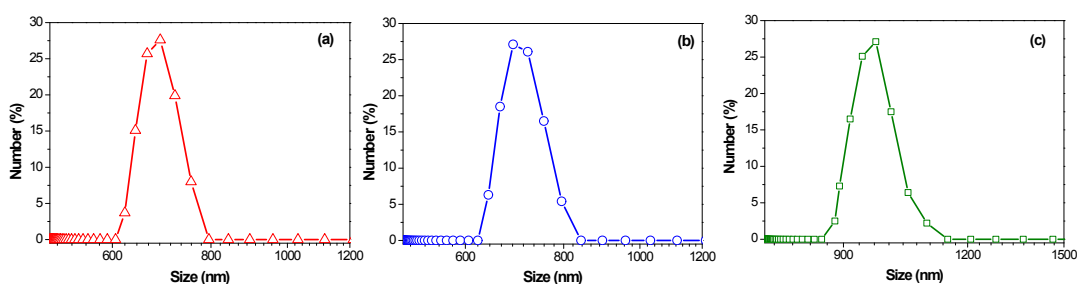

Figure S2 Size distribution of PLGA (a), PDA/PLGA (b) and AuNPs@PDA/PLGA (c) in pure water measured by dynamic lighting scattering technique.

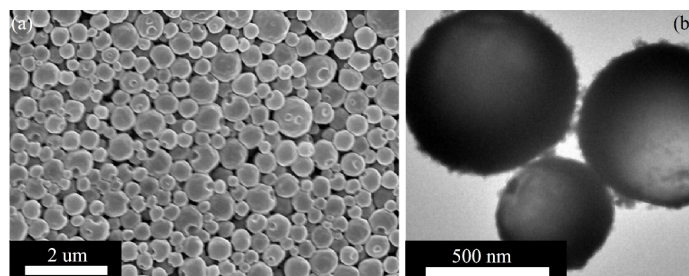

Figure S3 SEM (a) and TEM (b) images of PD/PLGA.

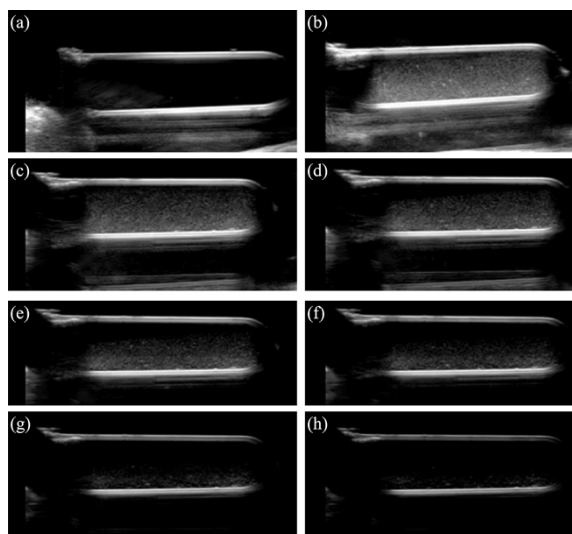

Figure S4 The *in vitro* ultrasound contrast imaging of AuNPs@PDA/PLGA hybrid capsules, (a) PBS, (b-h) harmonic mode, concentration of AuNPs@PDA/PLGA hybrid capsules = 5.0 mg·mL<sup>-1</sup>, MI = 0.7, 0.6, 0.5, 0.4, 0.3, 0.2 and 0.1.

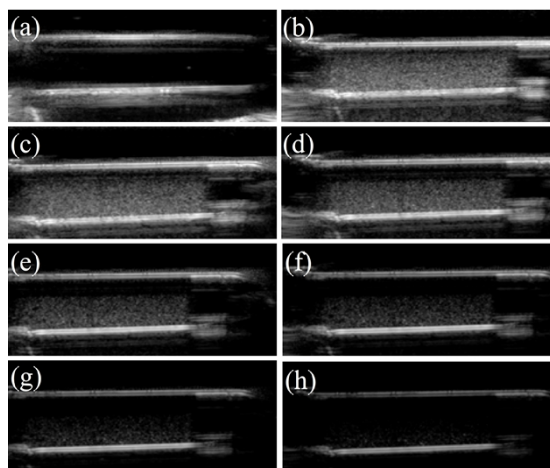

Figure S5 The *in vitro* ultrasound contrast imaging of AuNPs@PDA/PLGA hybrid capsules, (a) PBS, (b-h) contract mode, concentration = 5.0 mg·mL<sup>-1</sup>, MI = 0.51, 0.42, 0.33, 0.21, 0.08 and 0.05.
